# Supplementary material for: Cathepsin-L Secreted by High-Quality Bovine Embryos Exerts an Embryotrophic Effect In Vitro
Source: MDPI journal article supplement (doi:10.3390/ijms24076563), 2023-03-31
Supplement: s1 [file s1]

## THE EMBRYOTROPHIC EFFECT OF CATHEPSIN-L *IN VITRO*:

### SUPPLEMENTARY DATA

**Supplementary Table S1:** Proteins identified in a pool of medium conditioned by 90 embryos of good quality (TCN > 64 cells; MDC-ratio = 0.1 - 5%) and 90 embryos of poor quality (TCN < 64 cells; MDC-ratio > 90%) and not identified in the blank.

| Accession                                                               | Score <sup>a</sup> | #<br>Peptides <sup>b</sup><br>(p < 0.01) | #<br>Sequences<br>(p < 0.01) | Description                                      |
|-------------------------------------------------------------------------|--------------------|------------------------------------------|------------------------------|--------------------------------------------------|
| <b>'Good' quality embryos: TCN &gt; 64 cells; MDC-ratio = 0.1 - 5 %</b> |                    |                                          |                              |                                                  |
| 1 CATL1_BOVIN                                                           | 212                | 2                                        | 2                            | Cathepsin L1                                     |
| 2 VTDB_BOVIN                                                            | 191                | 3                                        | 3                            | Vitamin D-binding protein                        |
| 3 TTHY_BOVIN                                                            | 153                | 2                                        | 2                            | Transthyretin OS=Bos taurus                      |
| 4 A1AG_BOVIN                                                            | 81                 | 1                                        | 1                            | Alpha-1-acid glycoprotein                        |
| 5 MVP_BOVIN                                                             | 66                 | 1                                        | 1                            | Major vault protein                              |
| 6 PRDX1_BOVIN                                                           | 45                 | 1                                        | 1                            | Peroxiredoxin-1                                  |
| 7 SPRC_BOVIN                                                            | 44                 | 1                                        | 1                            | SPARC                                            |
| 8 FETA_BOVIN                                                            | 30                 | 1                                        | 1                            | Alpha-fetoprotein                                |
| <b>'Poor' quality embryos: TCN &lt; 64 cells; MDC-ratio &gt; 90 %</b>   |                    |                                          |                              |                                                  |
| 1 MVP_BOVIN                                                             | 1151               | 38                                       | 31                           | c                                                |
| 2 TTHY_BOVIN                                                            | 739                | 15                                       | 7                            | Transthyretin                                    |
| 3 PEBP1_BOVIN                                                           | 504                | 10                                       | 7                            | Phosphatidylethanolamine-binding protein 1       |
| 4 VTDB_BOVIN                                                            | 346                | 7                                        | 7                            | Vitamin D-binding protein                        |
| 5 A1AG_BOVIN                                                            | 333                | 10                                       | 9                            | Alpha-1-acid glycoprotein                        |
| 6 ACTB_BOVIN                                                            | 278                | 8                                        | 7                            | Actin, cytoplasmic 1                             |
| 7 PRDX2_BOVIN                                                           | 256                | 9                                        | 7                            | Peroxiredoxin-2                                  |
| 8 FABPH_BOVIN                                                           | 221                | 4                                        | 3                            | Fatty acid-binding protein, heart                |
| 9 INPP_BOVIN                                                            | 217                | 5                                        | 4                            | Inositol polyphosphate 1-phosphatase             |
| 10 PRDX1_BOVIN                                                          | 215                | 9                                        | 7                            | Peroxiredoxin-1                                  |
| 11 LYSM_BOVIN                                                           | 191                | 3                                        | 1                            | Lysozyme C, milk isozyme                         |
| 12 SODC_BOVIN                                                           | 185                | 5                                        | 4                            | Superoxide dismutase [Cu-Zn]                     |
| 13 SPA31_BOVIN                                                          | 158                | 6                                        | 4                            | Serpin A3-1                                      |
| 14 ACTC_BOVIN                                                           | 153                | 6                                        | 5                            | Actin, alpha cardiac muscle 1                    |
| 15 CASA1_BOVIN                                                          | 152                | 5                                        | 4                            | Alpha-S1-casein                                  |
| 16 LDHA_BOVIN                                                           | 149                | 4                                        | 3                            | L-lactate dehydrogenase A chain                  |
| 17 ACTA_BOVIN                                                           | 147                | 5                                        | 4                            | Actin, aortic smooth muscle                      |
| 18 UCHL1_BOVIN                                                          | 146                | 3                                        | 3                            | Ubiquitin carboxyl-terminal hydrolase isozyme L1 |
| 19 G6PI_BOVIN                                                           | 140                | 2                                        | 1                            | Glucose-6-phosphate isomerase                    |
| 20 SPA35_BOVIN                                                          | 127                | 5                                        | 3                            | Serpin A3-5                                      |
| 21 LDHB_BOVIN                                                           | 127                | 4                                        | 3                            | L-lactate dehydrogenase B chain                  |
| 22 NDKB_BOVIN                                                           | 111                | 6                                        | 4                            | Nucleoside diphosphate kinase B                  |
| 23 PARK7_BOVIN                                                          | 111                | 2                                        | 2                            | Protein/nucleic acid deglycase DJ-1              |
| 24 LACB_BOVIN                                                           | 110                | 2                                        | 2                            | Beta-lactoglobulin                               |
| 25 SPA33_BOVIN                                                          | 108                | 3                                        | 2                            | Serpin A3-3                                      |
| 26 AK1A1_BOVIN                                                          | 108                | 3                                        | 3                            | Alcohol dehydrogenase [NADP(+)]                  |
| 27 PDIA3_BOVIN                                                          | 105                | 5                                        | 5                            | Protein disulfide-isomerase A3                   |
| 28 CH10_BOVIN                                                           | 102                | 2                                        | 1                            | 10kDa heat shock protein, mitochondrial          |
| 29 NDKA1_BOVIN                                                          | 99                 | 5                                        | 3                            | Nucleoside diphosphate kinase A 1                |

|    |              |    |   |   |                                                            |
|----|--------------|----|---|---|------------------------------------------------------------|
| 30 | BIP_BOVIN    | 98 | 3 | 3 | Endoplasmic reticulum chaperone BiP                        |
| 31 | PRDX4_BOVIN  | 96 | 5 | 3 | Peroxiredoxin-4                                            |
| 32 | TYB4_BOVIN   | 93 | 1 | 1 | Thymosin beta-4                                            |
| 33 | ALDR_BOVIN   | 84 | 3 | 3 | Aldose reductase                                           |
| 34 | CALM_BOVIN   | 76 | 1 | 1 | Calmodulin                                                 |
| 35 | PDIA1_BOVIN  | 74 | 1 | 1 | Protein disulfide-isomerase                                |
| 36 | CASA2_BOVIN  | 72 | 2 | 2 | Alpha-S2-casein                                            |
| 37 | ARGI1_BOVIN  | 72 | 2 | 2 | Arginase-1                                                 |
| 38 | ADA_BOVIN    | 72 | 2 | 2 | Adenosine deaminase                                        |
| 39 | SBP1_BOVIN   | 70 | 1 | 1 | Selenium-binding protein 1                                 |
| 40 | FKBP1A_BOVIN | 70 | 1 | 1 | Peptidyl-prolyl cis-trans isomerase FKBP1A                 |
| 41 | RS27A_BOVIN  | 69 | 1 | 1 | Ubiquitin-40S ribosomal protein S27a                       |
| 42 | FABP5_BOVIN  | 67 | 3 | 3 | Fatty acid-binding protein, epidermal                      |
| 43 | IDHC_BOVIN   | 60 | 2 | 2 | Isocitrate dehydrogenase [NADP]<br>cytoplasmic             |
| 44 | H2B1N_BOVIN  | 57 | 1 | 1 | Histone H2B type 1-N                                       |
| 45 | PRDX3_BOVIN  | 55 | 1 | 1 | Thioredoxin-dependent peroxide<br>reductase, mitochondrial |
| 46 | GELS_BOVIN   | 54 | 1 | 1 | Gelsolin                                                   |
| 47 | ZP4_BOVIN    | 54 | 1 | 1 | Zona pellucida sperm-binding protein 4                     |
| 48 | PHS_BOVIN    | 54 | 2 | 2 | Pterin-4-alpha-carbinolamine dehydratase                   |
| 49 | HBA_BOVIN    | 54 | 2 | 2 | Hemoglobin subunit alpha                                   |
| 50 | TPM1_BOVIN   | 53 | 1 | 1 | Tropomyosin alpha-1 chain                                  |
| 51 | COF1_BOVIN   | 53 | 1 | 1 | Cofilin-1                                                  |
| 52 | MIF_BOVIN    | 53 | 1 | 1 | Macrophage migration inhibitory factor                     |
| 53 | VNN1_BOVIN   | 52 | 1 | 1 | Pantetheinase                                              |
| 54 | UCHL3_BOVIN  | 50 | 1 | 1 | Ubiquitin carboxyl-terminal hydrolase<br>isozyme L3        |
| 55 | SPA38_BOVIN  | 49 | 1 | 1 | Serpin A3-8                                                |
| 56 | FETA_BOVIN   | 46 | 4 | 1 | Alpha-fetoprotein                                          |
| 57 | SPA37_BOVIN  | 46 | 2 | 1 | Serpin A3-7                                                |
| 58 | CDK5_BOVIN   | 46 | 1 | 1 | Cyclin-dependent-like kinase 5                             |
| 59 | G3P_BOVIN    | 45 | 1 | 1 | Glyceraldehyde-3-phosphate<br>dehydrogenase                |
| 60 | CALU_BOVIN   | 45 | 2 | 2 | Calumenin                                                  |
| 61 | HSP7C_BOVIN  | 43 | 1 | 1 | Heat shock cognate 71 kDa protein                          |
| 62 | AATC_BOVIN   | 42 | 1 | 1 | Aspartate aminotransferase, cytoplasmic                    |
| 63 | HPT_BOVIN    | 41 | 1 | 1 | Haptoglobin                                                |
| 64 | MDHC_BOVIN   | 38 | 1 | 1 | Malate dehydrogenase, cytoplasmic                          |
| 65 | AOCX_BOVIN   | 38 | 1 | 1 | Primary amine oxidase, liver isozyme                       |
| 66 | PIPB_BOVIN   | 36 | 1 | 1 | Peptidyl-prolyl cis-trans isomerase B                      |
| 67 | TYB10_BOVIN  | 35 | 1 | 1 | Thymosin beta-10                                           |
| 68 | CALR_BOVIN   | 35 | 2 | 2 | Calreticulin                                               |
| 69 | IMPA1_BOVIN  | 34 | 1 | 1 | Inositol monophosphatase 1                                 |
| 70 | CASK_BOVIN   | 34 | 1 | 1 | Kappa-casein                                               |
| 71 | RHG29_BOVIN  | 33 | 1 | 1 | Rho GTPase-activating protein 29                           |
| 72 | ASGL1_BOVIN  | 32 | 1 | 1 | Isoaspartyl peptidase/L-asparaginase                       |
| 73 | HSPB1_BOVIN  | 32 | 1 | 1 | Heat shock protein beta-1                                  |
| 74 | FIBB_BOVIN   | 32 | 1 | 1 | Fibrinogen beta chain                                      |
| 75 | DSG1_BOVIN   | 32 | 1 | 1 | Desmoglein-1                                               |
| 76 | H2A1_BOVIN   | 32 | 1 | 1 | Histone H2A type 1                                         |

|    |             |    |   |   |                                                                        |
|----|-------------|----|---|---|------------------------------------------------------------------------|
| 77 | EZRI_BOVIN  | 30 | 1 | 1 | Ezrin                                                                  |
| 78 | CFAB_BOVIN  | 30 | 1 | 1 | Complement factor B                                                    |
| 79 | DNPEP_BOVIN | 29 | 1 | 1 | Aspartyl aminopeptidase                                                |
| 80 | PROF1_BOVIN | 28 | 1 | 1 | Profilin-1                                                             |
| 81 | ARC1B_BOVIN | 26 | 1 | 1 | Actin-related protein 2/3 complex subunit 1B                           |
| 82 | NNRE_BOVIN  | 26 | 1 | 1 | NAD(P)H-hydrate epimerase                                              |
| 83 | CPT1B_BOVIN | 26 | 1 | 1 | Carnitine O-palmitoyltransferase 1, muscle isoform                     |
| 84 | AATM_BOVIN  | 26 | 1 | 1 | Aspartate aminotransferase, mitochondrial                              |
| 85 | UACA_BOVIN  | 26 | 1 | 1 | Uveal autoantigen with coiled-coil domains and ankyrin repeats protein |

---

<sup>a</sup>The score of a peptide is a measure for the quality of the spectrum obtained after MSMS.

<sup>b</sup>The number of identified peptides is mentioned as a rough estimate of the abundance of this protein in the sample.

**Supplementary Table S2:** Proteins identified in a pool of medium conditioned by 26 embryos of 'excellent' quality (TCN > 64 cells; MDC-ratio = 0%) and 26 embryos of 'poor' quality (TCN < 64 cells; MDC-ratio > 90%) and not identified in the blank.

| Accession                                                              | Score <sup>a</sup> | #<br>Peptides <sup>b</sup><br>(p < 0.01) | #<br>Sequences<br>(p < 0.01) | Description                                |
|------------------------------------------------------------------------|--------------------|------------------------------------------|------------------------------|--------------------------------------------|
| <b>'Excellent' quality embryos: TCN &gt; 64 cells; MDC-ratio = 0 %</b> |                    |                                          |                              |                                            |
| 1 A1AG_BOVIN                                                           | 602                | 23                                       | 7                            | c                                          |
| 2 CASA1_BOVIN                                                          | 412                | 15                                       | 4                            | Alpha-S1-casein                            |
| 3 VTDB_BOVIN                                                           | 337                | 15                                       | 6                            | Vitamin D-binding protein                  |
| 4 SPA31_BOVIN                                                          | 246                | 10                                       | 5                            | Serpin A3-1                                |
| 5 TTHY_BOVIN                                                           | 227                | 7                                        | 2                            | Transthyretin                              |
| 6 SPA33_BOVIN                                                          | 171                | 6                                        | 2                            | Serpin A3-3                                |
| 7 ZA2G_BOVIN                                                           | 106                | 6                                        | 5                            | Zinc-alpha-2-glycoprotein                  |
| 8 AOCX_BOVIN                                                           | 94                 | 3                                        | 3                            | Primary amine oxidase, liver isozyme       |
| 9 MVP_BOVIN                                                            | 91                 | 4                                        | 4                            | Major vault protein                        |
| 10 AOCY_BOVIN                                                          | 86                 | 2                                        | 2                            | Primary amine oxidase, lung isozyme        |
| 11 VNN1_BOVIN                                                          | 81                 | 3                                        | 3                            | Pantetheinase                              |
| 12 ACTB_BOVIN                                                          | 79                 | 1                                        | 1                            | Actin, cytoplasmic 1                       |
| 13 H2A1_BOVIN                                                          | 78                 | 1                                        | 1                            | Histone H2A type 1                         |
| 14 RS27A_BOVIN                                                         | 75                 | 2                                        | 1                            | Ubiquitin-40S ribosomal protein S27a       |
| 15 LACB_BOVIN                                                          | 71                 | 3                                        | 2                            | Beta-lactoglobulin                         |
| 16 SPA38_BOVIN                                                         | 68                 | 2                                        | 1                            | Serpin A3-8                                |
| 17 K1C20_BOVIN                                                         | 66                 | 1                                        | 1                            | Keratin, type I cytoskeletal 20            |
| 18 ALDR_BOVIN                                                          | 52                 | 1                                        | 1                            | Aldose reductase                           |
| 19 TPIS_BOVIN                                                          | 50                 | 1                                        | 1                            | Triosephosphate isomerase                  |
| 20 FETA_BOVIN                                                          | 49                 | 10                                       | 1                            | Alpha-fetoprotein                          |
| 21 FETUA_BOVIN                                                         | 45                 | 1                                        | 1                            | Alpha-2-HS-glycoprotein                    |
| 22 PRDX1_BOVIN                                                         | 44                 | 1                                        | 1                            | Peroxiredoxin-1                            |
| 23 FABPH_BOVIN                                                         | 44                 | 1                                        | 1                            | Fatty acid-binding protein, heart          |
| 24 AOC3_BOVIN                                                          | 41                 | 1                                        | 1                            | Membrane primary amine oxidase             |
| 25 AMBP_BOVIN                                                          | 40                 | 1                                        | 1                            | Protein AMBP                               |
| 26 PEBP1_BOVIN                                                         | 38                 | 2                                        | 2                            | Phosphatidylethanolamine-binding protein 1 |
| 27 KNG1_BOVIN                                                          | 38                 | 2                                        | 2                            | Kininogen-1                                |
| 28 ZP4_BOVIN                                                           | 38                 | 1                                        | 1                            | Zona pellucida sperm-binding protein 4     |
| 29 CA226_BOVIN                                                         | 36                 | 1                                        | 1                            | Uncharacterized protein C1orf226 homolog   |
| 30 CASA2_BOVIN                                                         | 34                 | 3                                        | 2                            | Alpha-S2-casein                            |
| 31 PARK7_BOVIN                                                         | 33                 | 1                                        | 1                            | Protein/nucleic acid deglycase DJ-1        |
| 32 PRDX6_BOVIN                                                         | 32                 | 1                                        | 1                            | Peroxiredoxin-6                            |
| 33 ANT3_BOVIN                                                          | 31                 | 1                                        | 1                            | Antithrombin-III                           |
| 34 DSC1_BOVIN                                                          | 31                 | 1                                        | 1                            | Desmocollin-1                              |
| 35 CAB39_BOVIN                                                         | 31                 | 1                                        | 1                            | Calcium-binding protein 39                 |
| 36 K2C74_BOVIN                                                         | 29                 | 1                                        | 1                            | Keratin, type II cytoskeletal 74           |
| 37 CATL1_BOVIN                                                         | 26                 | 2                                        | 2                            | Cathepsin L1                               |
| 38 NDKB_BOVIN                                                          | 26                 | 1                                        | 1                            | Nucleoside diphosphate kinase B            |
| 39 INPP_BOVIN                                                          | 26                 | 1                                        | 1                            | Inositol polyphosphate 1-phosphatase       |
| 40 SODC_BOVIN                                                          | 25                 | 1                                        | 1                            | Superoxide dismutase [Cu-Zn]               |
| 41 ORC4_BOVIN                                                          | 24                 | 1                                        | 1                            | Origin recognition complex subunit 4       |

|                                                                       |             |      |    |    |                                                  |
|-----------------------------------------------------------------------|-------------|------|----|----|--------------------------------------------------|
| 42                                                                    | LYSM_BOVIN  | 23   | 1  | 1  | Lysozyme C, milk isozyme                         |
| 43                                                                    | REXO5_BOVIN | 22   | 1  | 1  | RNA exonuclease 5                                |
| <b>'Poor' quality embryos: TCN &lt; 64 cells; MDC-ratio &gt; 90 %</b> |             |      |    |    |                                                  |
| 1                                                                     | MVP_BOVIN   | 1429 | 52 | 31 | Major vault protein                              |
| 2                                                                     | A1AG_BOVIN  | 1015 | 29 | 9  | Alpha-1-acid glycoprotein                        |
| 3                                                                     | TTHY_BOVIN  | 956  | 25 | 7  | Transthyretin                                    |
| 4                                                                     | PEBP1_BOVIN | 825  | 25 | 9  | Phosphatidylethanolamine-binding protein 1       |
| 5                                                                     | VTDB_BOVIN  | 513  | 17 | 8  | Vitamin D-binding protein                        |
| 6                                                                     | NDKB_BOVIN  | 493  | 11 | 4  | Nucleoside diphosphate kinase B                  |
| 7                                                                     | NDKA1_BOVIN | 441  | 8  | 3  | Nucleoside diphosphate kinase A 1                |
| 8                                                                     | SODC_BOVIN  | 411  | 7  | 3  | Superoxide dismutase [Cu-Zn]                     |
| 9                                                                     | G6PI_BOVIN  | 401  | 11 | 9  | Glucose-6-phosphate isomerase                    |
| 10                                                                    | INPP_BOVIN  | 316  | 12 | 7  | Inositol polyphosphate 1-phosphatase             |
| 11                                                                    | SPA31_BOVIN | 301  | 10 | 8  | Serpin A3-1                                      |
| 12                                                                    | PRDX6_BOVIN | 290  | 10 | 9  | Peroxiredoxin-6                                  |
| 13                                                                    | SPA32_BOVIN | 280  | 9  | 7  | Serpin A3-2                                      |
| 14                                                                    | PDIA3_BOVIN | 264  | 10 | 10 | Protein disulfide-isomerase A3                   |
| 15                                                                    | KCRU_BOVIN  | 260  | 7  | 5  | Creatine kinase U-type, mitochondrial            |
| 16                                                                    | PRDX2_BOVIN | 244  | 9  | 8  | Peroxiredoxin-2                                  |
| 17                                                                    | FABPH_BOVIN | 242  | 8  | 6  | Fatty acid-binding protein, heart                |
| 18                                                                    | CALR_BOVIN  | 234  | 6  | 4  | Calreticulin                                     |
| 19                                                                    | ACTB_BOVIN  | 232  | 7  | 5  | Actin, cytoplasmic 1                             |
| 20                                                                    | ADA_BOVIN   | 226  | 7  | 7  | Adenosine deaminase                              |
| 21                                                                    | ACTC_BOVIN  | 215  | 6  | 4  | Actin, alpha cardiac muscle 1                    |
| 22                                                                    | BIP_BOVIN   | 211  | 6  | 6  | Endoplasmic reticulum chaperone BiP              |
| 23                                                                    | LYSM_BOVIN  | 210  | 6  | 1  | Lysozyme C, milk isozyme                         |
| 24                                                                    | SPA33_BOVIN | 205  | 5  | 4  | Serpin A3-3                                      |
| 25                                                                    | SPA35_BOVIN | 204  | 4  | 3  | Serpin A3-5                                      |
| 26                                                                    | ENOA_BOVIN  | 204  | 3  | 2  | Alpha-enolase                                    |
| 27                                                                    | LDHA_BOVIN  | 192  | 7  | 5  | L-lactate dehydrogenase A chain                  |
| 28                                                                    | IDHC_BOVIN  | 183  | 8  | 8  | Isocitrate dehydrogenase [NADP] cytoplasmic      |
| 29                                                                    | LACB_BOVIN  | 181  | 3  | 3  | Beta-lactoglobulin                               |
| 30                                                                    | DNPEP_BOVIN | 178  | 5  | 5  | Aspartyl aminopeptidase                          |
| 31                                                                    | PARK7_BOVIN | 178  | 6  | 5  | Protein/nucleic acid deglycase DJ-1              |
| 32                                                                    | ENOB_BOVIN  | 175  | 2  | 1  | Beta-enolase                                     |
| 33                                                                    | CASA1_BOVIN | 173  | 6  | 3  | Alpha-S1-casein                                  |
| 34                                                                    | TYB4_BOVIN  | 172  | 4  | 2  | Thymosin beta-4                                  |
| 35                                                                    | ACTA_BOVIN  | 171  | 5  | 3  | Actin, aortic smooth muscle                      |
| 36                                                                    | SODM_BOVIN  | 159  | 6  | 2  | Superoxide dismutase [Mn], mitochondrial         |
| 37                                                                    | CALU_BOVIN  | 147  | 5  | 4  | Calumenin                                        |
| 38                                                                    | CALM_BOVIN  | 146  | 4  | 3  | Calmodulin                                       |
| 39                                                                    | AK1A1_BOVIN | 138  | 6  | 6  | Alcohol dehydrogenase [NADP(+)]                  |
| 40                                                                    | AATM_BOVIN  | 135  | 5  | 5  | Aspartate aminotransferase, mitochondrial        |
| 41                                                                    | PDIA1_BOVIN | 130  | 5  | 4  | Protein disulfide-isomerase                      |
| 42                                                                    | ALDR_BOVIN  | 126  | 3  | 3  | Aldose reductase                                 |
| 43                                                                    | CH10_BOVIN  | 123  | 3  | 2  | 10 kDa heat shock protein, mitochondrial         |
| 44                                                                    | PRDX1_BOVIN | 120  | 7  | 6  | Peroxiredoxin-1                                  |
| 45                                                                    | UCHL1_BOVIN | 116  | 4  | 4  | Ubiquitin carboxyl-terminal hydrolase isozyme L1 |

|    |             |     |    |   |                                                         |
|----|-------------|-----|----|---|---------------------------------------------------------|
| 46 | ZP4_BOVIN   | 115 | 2  | 2 | Zona pellucida sperm-binding protein 4                  |
| 47 | TPIS_BOVIN  | 110 | 4  | 3 | Triosephosphate isomerase                               |
| 48 | ATPA_BOVIN  | 104 | 1  | 1 | ATP synthase subunit alpha, mitochondrial               |
| 49 | UCHL3_BOVIN | 103 | 3  | 3 | Ubiquitin carboxyl-terminal hydrolase isozyme L3        |
| 50 | ARGI1_BOVIN | 101 | 3  | 3 | Arginase-1                                              |
| 51 | AMY1_HUMAN  | 99  | 3  | 2 | Alpha-amylase 1                                         |
| 52 | FKB1A_BOVIN | 98  | 2  | 2 | Peptidyl-prolyl cis-trans isomerase FKBP1A              |
| 53 | AOCX_BOVIN  | 94  | 4  | 4 | Primary amine oxidase, liver isozyme                    |
| 54 | SBP1_BOVIN  | 91  | 4  | 4 | Selenium-binding protein 1                              |
| 55 | PROF1_BOVIN | 87  | 2  | 2 | Profilin-1                                              |
| 56 | LDHB_BOVIN  | 85  | 4  | 4 | L-lactate dehydrogenase B chain                         |
| 57 | SPA38_BOVIN | 84  | 2  | 2 | Serpin A3-8                                             |
| 58 | PGAM1_BOVIN | 80  | 3  | 3 | Phosphoglycerate mutase 1                               |
| 59 | AOC3_BOVIN  | 79  | 2  | 2 | Membrane primary amine oxidase                          |
| 60 | SUMO2_BOVIN | 78  | 1  | 1 | Small ubiquitin-related modifier 2                      |
| 61 | H2A1_BOVIN  | 77  | 1  | 1 | Histone H2A type 1                                      |
| 62 | ORN_BOVIN   | 75  | 2  | 2 | Oligoribonuclease, mitochondrial                        |
| 63 | QOR_BOVIN   | 74  | 1  | 1 | Zeta-crystallin                                         |
| 64 | SH3L3_BOVIN | 74  | 2  | 2 | SH3 domain-binding glutamic acid-rich-like protein 3    |
| 65 | NASP_BOVIN  | 70  | 2  | 2 | Nuclear autoantigenic sperm protein                     |
| 66 | ASGL1_BOVIN | 70  | 4  | 4 | Isoaspartyl peptidase/L-asparaginase                    |
| 67 | LDH6B_BOVIN | 67  | 2  | 1 | L-lactate dehydrogenase A-like 6B                       |
| 68 | HPT_BOVIN   | 67  | 2  | 2 | Haptoglobin                                             |
| 69 | K1C20_BOVIN | 66  | 1  | 1 | Keratin, type I cytoskeletal 20                         |
| 70 | CATA_BOVIN  | 65  | 1  | 1 | Catalase                                                |
| 71 | G3P_BOVIN   | 63  | 2  | 2 | Glyceraldehyde-3-phosphate dehydrogenase                |
| 72 | MYDGF_BOVIN | 63  | 2  | 2 | Myeloid-derived growth factor                           |
| 73 | PRDX4_BOVIN | 62  | 4  | 3 | Peroxiredoxin-4                                         |
| 74 | STMN1_BOVIN | 60  | 2  | 2 | Stathmin                                                |
| 75 | AOCY_BOVIN  | 57  | 1  | 1 | Primary amine oxidase, lung isozyme                     |
| 76 | PRDX3_BOVIN | 57  | 3  | 2 | Thioredoxin-dependent peroxide reductase, mitochondrial |
| 77 | CFAB_BOVIN  | 57  | 1  | 1 | Complement factor B                                     |
| 78 | FETA_BOVIN  | 56  | 12 | 1 | Alpha-fetoprotein                                       |
| 79 | MIF_BOVIN   | 55  | 2  | 1 | Macrophage migration inhibitory factor                  |
| 80 | GGCT_BOVIN  | 54  | 1  | 1 | Gamma-glutamylcyclotransferase                          |
| 81 | ACPM_BOVIN  | 54  | 1  | 1 | Acyl carrier protein, mitochondrial                     |
| 82 | CASK_BOVIN  | 53  | 1  | 1 | Kappa-casein                                            |
| 83 | HBA_BOVIN   | 53  | 1  | 1 | Hemoglobin subunit alpha                                |
| 84 | ANXA2_BOVIN | 52  | 1  | 1 | Annexin A2                                              |
| 85 | CLUS_BOVIN  | 52  | 2  | 2 | Clusterin                                               |
| 86 | PPIB_BOVIN  | 52  | 4  | 3 | Peptidyl-prolyl cis-trans isomerase B                   |
| 87 | DSG1_BOVIN  | 52  | 2  | 2 | Desmoglein-1                                            |
| 88 | 1433Z_BOVIN | 51  | 1  | 1 | 14-3-3 protein zeta/delta SV=1                          |
| 89 | FETUA_BOVIN | 51  | 1  | 1 | Alpha-2-HS-glycoprotein                                 |
| 90 | IMPA1_BOVIN | 51  | 2  | 2 | Inositol monophosphatase 1                              |
| 91 | HSP7C_BOVIN | 50  | 1  | 1 | Heat shock cognate 71 kDa protein                       |
| 92 | FPPS_BOVIN  | 50  | 2  | 2 | Farnesyl pyrophosphate synthase                         |
| 93 | ACTN1_BOVIN | 50  | 1  | 1 | Alpha-actinin-1                                         |

|     |             |    |   |   |                                                                                                                   |
|-----|-------------|----|---|---|-------------------------------------------------------------------------------------------------------------------|
| 94  | ATOX1_BOVIN | 48 | 1 | 1 | Copper transport protein ATOX1                                                                                    |
| 95  | NALP5_BOVIN | 48 | 1 | 1 | NACHT, LRR and PYD domains-containing protein 5                                                                   |
| 96  | THOP1_BOVIN | 48 | 2 | 2 | Thimet oligopeptidase                                                                                             |
| 97  | KNG1_BOVIN  | 47 | 1 | 1 | Kininogen-1                                                                                                       |
| 98  | A1AT_BOVIN  | 47 | 1 | 1 | Alpha-1-antiproteinase                                                                                            |
| 99  | FHIT_BOVIN  | 44 | 2 | 2 | Bis(5~-adenosyl)-triphosphatase                                                                                   |
| 100 | ZA2G_BOVIN  | 44 | 4 | 4 | Zinc-alpha-2-glycoprotein                                                                                         |
| 101 | ODO2_BOVIN  | 42 | 1 | 1 | Dihydrolipoyllysine-residue succinyl-transferase component of 2-oxoglutarate dehydrogenase complex, mitochondrial |
| 102 | TPM1_BOVIN  | 42 | 1 | 1 | Tropomyosin alpha-1 chain                                                                                         |
| 103 | HSPB1_BOVIN | 41 | 1 | 1 | Heat shock protein beta-1                                                                                         |
| 104 | NTF2_BOVIN  | 41 | 1 | 1 | Nuclear transport factor 2                                                                                        |
| 105 | ANT3_BOVIN  | 41 | 1 | 1 | Antithrombin-III                                                                                                  |
| 106 | 1433E_BOVIN | 40 | 1 | 1 | 14-3-3 protein epsilon                                                                                            |
| 107 | AATC_BOVIN  | 40 | 2 | 2 | Aspartate aminotransferase, cytoplasmic                                                                           |
| 108 | OOEP_BOVIN  | 38 | 1 | 1 | Oocyte-expressed protein homolog                                                                                  |
| 109 | PDIA4_BOVIN | 38 | 1 | 1 | Protein disulfide-isomerase A4                                                                                    |
| 110 | LSM3_BOVIN  | 38 | 1 | 1 | U6 snRNA-associated Sm-like protein LSM3                                                                          |
| 111 | EF1A1_BOVIN | 38 | 1 | 1 | Elongation factor 1-alpha 1                                                                                       |
| 112 | MDHC_BOVIN  | 37 | 2 | 2 | Malate dehydrogenase, cytoplasmic                                                                                 |
| 113 | GDIR1_BOVIN | 35 | 1 | 1 | Rho GDP-dissociation inhibitor 1                                                                                  |
| 114 | UGPA_BOVIN  | 34 | 1 | 1 | UTP--glucose-1-phosphate uridylyltransferase                                                                      |
| 115 | PHS_BOVIN   | 34 | 3 | 2 | Pterin-4-alpha-carbinolamine dehydratase                                                                          |
| 116 | PPIC_BOVIN  | 32 | 1 | 1 | Peptidyl-prolyl cis-trans isomerase C                                                                             |
| 117 | GNS_BOVIN   | 32 | 1 | 1 | N-acetylglucosamine-6-sulfatase                                                                                   |
| 118 | GLRX1_BOVIN | 31 | 1 | 1 | Glutaredoxin-1                                                                                                    |
| 119 | RS27A_BOVIN | 31 | 1 | 1 | Ubiquitin-40S ribosomal protein S27a                                                                              |
| 120 | H2A2C_BOVIN | 31 | 1 | 1 | Histone H2A type 2-C                                                                                              |
| 121 | RHG29_BOVIN | 29 | 1 | 1 | Rho GTPase-activating protein 29                                                                                  |
| 122 | CPT1B_BOVIN | 29 | 1 | 1 | Carnitine O-palmitoyltransferase 1, muscle isoform                                                                |
| 123 | NNRE_BOVIN  | 27 | 1 | 1 | NAD(P)H-hydrate epimerase                                                                                         |
| 124 | PTRD1_BOVIN | 27 | 1 | 1 | Putative peptidyl-tRNA hydrolase PTRHD1                                                                           |
| 125 | FKBP2_BOVIN | 26 | 1 | 1 | Peptidyl-prolyl cis-trans isomerase FKBP2                                                                         |
| 126 | ZP3_BOVIN   | 25 | 1 | 1 | Zona pellucida sperm-binding protein 3                                                                            |
| 127 | B2MG_BOVIN  | 22 | 1 | 1 | Beta-2-microglobulin                                                                                              |

<sup>a</sup> The score of a peptide is a measure for the quality of the spectrum obtained after MSMS.

<sup>b</sup> The number of identified peptides is mentioned as a rough estimate of the abundance of this protein in the sample.

**Supplementary Table S3.** Dose-response curve of cathepsin-L: development of embryos cultured in groups in three different concentrations of cathepsin-L (1 µg/ml, 100 ng/ml and 10 ng/ml) and in control medium.

| Medium    | Cleavage Rate <sup>A</sup> | Fast Cleavers <sup>B</sup> | Blastocyst Rate <sup>A</sup> |             | Hatching Rate <sup>C</sup> |
|-----------|----------------------------|----------------------------|------------------------------|-------------|----------------------------|
|           |                            |                            | 168 hpi                      | 192 hpi     |                            |
| Control   | 90.3 ± 2.37                | 11.2 ± 2.93 <sup>a</sup>   | 23.9 ± 3.42                  | 36.8 ± 3.87 | 21.1 ± 5.40                |
| 1 µg/ml   | 88.2 ± 2.27                | 22.1 ± 3.69 <sup>ab</sup>  | 23.6 ± 2.98                  | 37.9 ± 3.41 | 22.1 ± 4.73                |
| 100 ng/ml | 85.1 ± 2.70                | 25.8 ± 4.29 <sup>b</sup>   | 31.6 ± 3.52                  | 43.1 ± 3.75 | 26.7 ± 5.11                |
| 10 ng/ml  | 88.4 ± 2.27                | 16.8 ± 3.24 <sup>ab</sup>  | 23.6 ± 3.01                  | 38.2 ± 3.44 | 11.8 ± 3.71                |

Data are represented as least-square mean ± SE. Within each column, values that differ significantly are indicated by different superscripts ( $p < 0.05$ ). Immature bovine oocytes ( $n = 1.202$ , 4 replicates) were harvested from slaughterhouse ovaries for *in vitro* maturation and fertilization, as previously described. Fertilized zygotes were cultured in groups (25 presumed zygote per 50 µl droplet) in medium supplemented with different concentrations of cathepsin-L (1 µg/ml:  $n = 203$ ; 100 ng/ml,  $n = 174$ ; 10 ng/ml,  $n = 199$ ) or in control medium (SOF/BSA/ITS;  $n = 115$ ). All droplets were covered with paraffin oil and embryos were cultured at 38.5°C in 5% CO<sub>2</sub>, 5% O<sub>2</sub> and 90% N<sub>2</sub> until 192 hpi. <sup>A</sup> Cleavage and Blastocysts rates are calculated as the number of cleaved zygotes resp. blastocysts divided by the total number of presumed zygotes in the corresponding treatment group ( $n = 155$ , 203, 174 and 199 for control, 1 µg/ml, 100 ng/ml and 10 ng/ml respectively). <sup>B</sup> The proportion of fast cleavers is shown as the percentage of zygotes that cleaved into 5- or 8-cells at 45hpi compared to the total number of cleaved zygotes in the corresponding treatment group ( $n = 140$ , 179, 148 and 176 for control, 1 µg/ml, 100 ng/ml and 10 ng/ml respectively). <sup>C</sup> The hatching rate was calculated as the percentage of hatching or hatched blastocysts compared to the total number of blastocysts at 192 hp in the corresponding treatment group ( $n = 57$ , 77, 75 and 76 for control, 1 µg/ml, 100 ng/ml and 10 ng/ml respectively).
